# Supplementary material for: Detection of QTLs for white-back and basal-white grains caused by high temperature during ripening period in japonica rice
Source: PubMed Central journal article supplement — Breed Sci. 2015 Jun 1;65(3):216–25. doi: 10.1270/jsbbs.65.216 (PMC4482171; doi:10.1270/jsbbs.65.216), 2015-06-01
Supplement: 65_216_1.pdf [file 65_216_1.pdf]

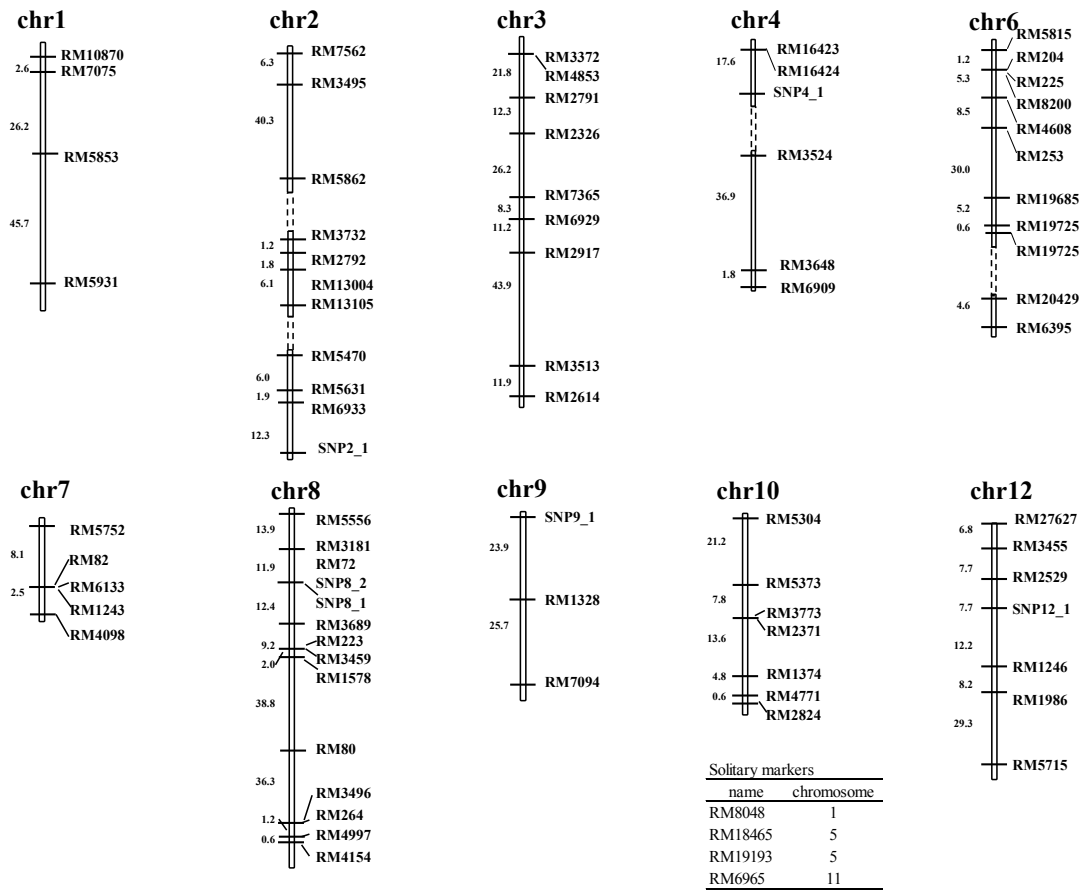

**Supplemental Fig. 1.** Linkage map constructed with recombinant inbred lines derived from the cross between ‘Tsukushiroman’ and ‘Chikushi 52’.
