# Supplementary material for: Detection of QTLs for white-back and basal-white grains caused by high temperature during ripening period in japonica rice
Source: PubMed Central journal article supplement — Breed Sci. 2015 Jun 1;65(3):216–25. doi: 10.1270/jsbbs.65.216 (PMC4482171; doi:10.1270/jsbbs.65.216), 2015-06-01
Supplement: 65_216_2.pdf [file 65_216_2.pdf]

**Supplemental Table 1.** Cleaved amplified polymorphic sequences (CAPS) and derived cleaved amplified polymorphic sequences (dCAPS) markers generated and used in this study

| Marker name | Marker type | Chromosome | Position <sup>a</sup><br>(bp) | Forward sequence     | Reverse sequence             | Enzyme       | Non-digested<br>product size<br>(bp) | Digested<br>product size<br>(bp) |
|-------------|-------------|------------|-------------------------------|----------------------|------------------------------|--------------|--------------------------------------|----------------------------------|
| SNP2_1      | CAPS        | 2          | 32,868,024                    | tggagggactaggacgtgac | gtagacggaaggatgcagg          | HinfI/HinfI  | 290                                  | 63/227                           |
| SNP4_1      | CAPS        | 4          | 14,525,362                    | tccgacagatatccgattcc | tgtgctgcaattactccc           | XspI/BfaI    | 43/150                               | 40/43/110                        |
| SNP8_1      | CAPS        | 8          | 13,736,748                    | accgactcttttctctgggt | agttgaggctgctgattggt         | ApoI         | 270                                  | 115/155                          |
| SNP12_1     | CAPS        | 12         | 11,158,684                    | ggaattgagccaaggaatca | tgcaaaaacagtaccggaca         | TaqI/TaqI    | 237                                  | 84/153                           |
| SNP8_2      | dCAPS       | 8          | 10,802,038                    | tgtattcgaatgtgaagggg | gtgttgatgtggcaccttg          | EcoT14I/StyI | 178                                  | 20/158                           |
| SNP9_1      | dCAPS       | 9          | 876,109                       | cattgcgcactgaactatgg | tatgtcagctataacaagattgaactga | DdeI         | 111                                  | 28/83                            |

<sup>a</sup> Position information was based on the IRGSP Releases Build 4.0 Pseudomolecules of the Rice Genome.
